# Supplementary material for: The Agaricus blazei-Based Mushroom Extract, Andosan™, Protects against Intestinal Tumorigenesis in the A/J Min/+ Mouse
Source: PLoS One. 2016 Dec 21;11(12):e0167754. doi: 10.1371/journal.pone.0167754 (PMC5176274; doi:10.1371/journal.pone.0167754)
Supplement: S1 Text — (XLSX) [file pone.0167754.s001.xlsx]

## Sheet: Animal data
Animal ID	APC genotype	Treatment	cageName	Sex	DOB	Litter	Breeding cage	IL-1b	IL-2	IL-4	IL-5	IL-6	IL-10	IL-17A	GM-CSF	IFN-y	MCP-1	TNF-a	IL-12p70	BW of AJMINagaricus.jmp	Number of small intestinal tumors	Number of colon tumors	Total tumor number	Tumor load small intestine	Tumor load colon	Total tumor load
WINAMN94.3M3	APCmin	Agaricus	WINAMN94.3M	M	3359491200	WINAMN94.3	WINAMN94													28.6	12	2	14	4.35	1.0676	5.4176
WINAMN94.3F1	APCmin	Agaricus	WINAMN94.3F	F	3359491200	WINAMN94.3	WINAMN94													26.7	34	0	34	18.13	0	18.13
WINAMN94.3F2	APCmin	Agaricus	WINAMN94.3F	F	3359491200	WINAMN94.3	WINAMN94													23.8
WINAMN86.3M1	APCmin	Water	WINAMN86.3M	M	3359491200	WINAMN86.3	WINAMN86													26.32	12	2	14	5.99	0.8831	6.8731
WINAMN86.3M2	APCmin	Water	WINAMN86.3M	M	3359491200	WINAMN86.3	WINAMN86													28.3	27	7	34	12.78	13.6747	26.4547
WINAMN86.3F1	wt	Water	WINAMN86.3F	F	3359491200	WINAMN86.3	WINAMN86													24.9
WINAMN86.3F2	wt	Water	WINAMN86.3F	F	3359491200	WINAMN86.3	WINAMN86													29.4
WINAMN86.3F3	APCmin	Water	WINAMN86.3F	F	3359491200	WINAMN86.3	WINAMN86													21.5	36	3	39	24.3	3.56	27.86
WINAMN86.3F4	APCmin	Water	WINAMN86.3F	F	3359491200	WINAMN86.3	WINAMN86													24.46	34	1	35	17.79	0.2826	18.0726
WINAMN86.3F6	APCmin	Water	WINAMN86.3F	F	3359491200	WINAMN86.3	WINAMN86													19	36	2	38	25.14	1.7349	26.8749
WINAMN88.3F1	wt	Water	WINAMN88.3F	F	3359404800	WINAMN88.3	WINAMN88													26.7
WINAMN88.3M3	APCmin	Water	WINAMN88.3M	M	3359404800	WINAMN88.3	WINAMN88													31.2	27	3	30	22.06	17.1719	39.2319
WINAMN59.3M1	APCmin	Agaricus	WINAMN59(A)	M	3350592000	WINAMN59.3	WINAMN59													27.6	20	5	25	30.9	14.9523	45.8523
WINAMN82.2F3	wt	Water	WINAMN82.2F	F	3355776000	WINAMN82.2	WINAMN82													27
WINAMN93.3M1	APCmin	Agaricus	WINAMN93.3M	M	3360787200	WINAMN93.3	WINAMN93													25.1	5	4	9	3.26	1.5465	4.8065
WINAMN93.3M4	APCmin	Agaricus	WINAMN93.3M	M	3360787200	WINAMN93.3	WINAMN93													35	19	1	20	12.88	0.785	13.665
WINAMN93.3F2	APCmin	Agaricus	WINAMN93.3F	F	3360787200	WINAMN93.3	WINAMN93													24.46	18	1	19	5.268	0.785	6.053
WINAMN93.3F3	wt	Agaricus	WINAMN93.3F	F	3360787200	WINAMN93.3	WINAMN93													20.2
WINAMN76.4F2	wt	Agaricus	WINAMN76.4F	F	3360873600	WINAMN76.4	WINAMN76													22.3
WINAMN76.4F4	wt	Agaricus	WINAMN76.4F	F	3360873600	WINAMN76.4	WINAMN76													21.3
WINAMN76.4F6	APCmin	Agaricus	WINAMN76.4F	F	3360873600	WINAMN76.4	WINAMN76													23	28	2	30	33.52	1.2266	34.7466
WINAMN92.2M1	wt	Water	WINAMN92.2M	M	3356294400	WINAMN92.2	WINAMN92													28.7	6	2	8	7.12	4.3666	11.4866
WINAMN94.2F1	APCmin	Water	WINAMN94.2F	F	3356294400	WINAMN94.2	WINAMN94													25.9
WINAMN72.5M3	APCmin	Water	WINAMN72.5M	M	3360096000	WINAMN72.5	WINAMN72													29.5	28	9	37	25.76	12.0694	37.8294
WINAMN82.3F6	APCmin	Water	WINAMN82.3F	F	3358195200	WINAMN82.3	WINAMN82													24.8
WINAMN73.4M2	wt	Water	WINAMN73.4M	M	3360182400	WINAMN73.4	WINAMN73													26.7
WINAMN97.2M3	APCmin	Water	WINAMN97.2M	M	3360096000	WINAMN97.2	WINAMN97													27.6
WINAMN97.2M4	wt	Water	WINAMN97.2M	M	3360096000	WINAMN97.2	WINAMN97													30
WINAMN97.2M5	APCmin	Water	WINAMN97.2M	M	3360096000	WINAMN97.2	WINAMN97													32.6
WINAMN92.3F2	wt	Agaricus	WINAMN92.3F	F	3360096000	WINAMN92.3	WINAMN92													23.6
WINAMN92.3F3	APCmin	Agaricus	WINAMN92.3F	F	3360096000	WINAMN92.3	WINAMN92													22	23	2	25	13.96	3.3637	17.3237
WINAMN73.4F1	APCmin	Water	WINAMN73.4F	F	3360182400	WINAMN73.4	WINAMN73													24.9	13	3	16	6.56	0.8341	7.3941
WINAMN73.4F2	wt	Water	WINAMN73.4F	F	3360182400	WINAMN73.4	WINAMN73													28.7
WINAMN73.4F3	APCmin	Water	WINAMN73.4F	F	3360182400	WINAMN73.4	WINAMN73													30.3	35	2	37	28.13	3.6306	31.7606
WINAMN73.4F4	wt	Water	WINAMN73.4F	F	3360182400	WINAMN73.4	WINAMN73													25.4
WINAMN54.6M1	wt	Water	WINAMN54.6M	M	3358627200	WINAMN54.6	WINAMN54
WINAMN54.6M2	wt	Water	WINAMN54.6M	M	3358627200	WINAMN54.6	WINAMN54
WINAMN54.6F3	wt	Water	WINAMN54.6F	F	3358627200	WINAMN54.6	WINAMN54													20.5
WINAMN81.3F1	wt	Water	WINAMN81.3F	F	3358627200	WINAMN81.3	WINAMN81
WINAMN81.3F2	APCmin	Water	WINAMN81.3F	F	3358627200	WINAMN81.3	WINAMN81
WINAMN81.3F3	APCmin	Water	WINAMN81.3F	F	3358627200	WINAMN81.3	WINAMN81
WINAMN81.3F4	wt	Water	WINAMN81.3F	F	3358627200	WINAMN81.3	WINAMN81
WINAMN81.3F5	wt	Water	WINAMN81.3F	F	3358627200	WINAMN81.3	WINAMN81
WINAMN58.4M1	APCmin	Agaricus	WINAMN58.4M	M	3358972800	WINAMN58.4	WINAMN58
WINAMN58.4M2	wt	Agaricus	WINAMN58.4M	M	3358972800	WINAMN58.4	WINAMN58													25.6
WINAMN58.4M3	APCmin	Agaricus	WINAMN58.4M	M	3358972800	WINAMN58.4	WINAMN58													30
WINAMN58.4F1	APCmin	Agaricus	WINAMN58.4F	F	3358972800	WINAMN58.4	WINAMN58													27.6	29	3	32	34.65	0.5888	35.2388
WINAMN58.4F2	APCmin	Agaricus	WINAMN58.4F	F	3358972800	WINAMN58.4	WINAMN58													30.5
WINAMN58.4F3	APCmin	Agaricus	WINAMN58.4F	F	3358972800	WINAMN58.4	WINAMN58													25.4	34	3	37	35.85	11.8731	47.7231
WINAMN62.3M1	APCmin	Agaricus	WINAMN62.3M	M	3359059200	WINAMN62.3	WINAMN62													29.8
WINAMN62.3M2	APCmin	Agaricus	WINAMN62.3M	M	3359059200	WINAMN62.3	WINAMN62													26	32	12	44	31.31	8.5369	39.8469
WINAMN62.3F1	APCmin	Agaricus	WINAMN62.3F	F	3359059200	WINAMN62.3	WINAMN62													24.6	31	10	41	58.66	2.0724	60.7324
WINAMN62.3F2	wt	Agaricus	WINAMN62.3F	F	3359059200	WINAMN62.3	WINAMN62													29.1
WINAMN94.2F2	APCmin	Water	WINAMN94.2F	F	3356294400	WINAMN94.2	WINAMN94
WINAMN65.1M3	APCmin	Agaricus	WINAMN65.1M	M	3349814400	WINAMN65.1	WINAMN65
WINAMN84.4F1	wt	Agaricus	WINAMN84.4F	F	3359404800	WINAMN84.4	WINAMN84	510.34	47.34	28.97	52.34	66.65	115.69	120.1	169.48	100.83	688.28	1121.57	632.92	24
WINAMN84.4F2	APCmin	Agaricus	WINAMN84.4F	F	3359404800	WINAMN84.4	WINAMN84	343.49	44.37	20.75	37.18	43.58	72.19	141.26	160.15	77.37	501.41	895.33	563.39	18.4
WINAMN84.4M1	wt	Agaricus	WINAMN84.4M	M	3359404800	WINAMN84.4	WINAMN84	225.76	29.19	15.47	33.62	38.27	128.39	72.46	133.95	60.79	612.18	770.34	220.76	27.6
WINAMN84.4M2	APCmin	Agaricus	WINAMN84.4M	M	3359404800	WINAMN84.4	WINAMN84	97.37	43.92	6.72	16.15	21.2	64.94	72.31	74.42	36.59	507.3	479.73	114.91	22.9	28	2	30	15.06	2.0116	17.0716
WINAMN94.3M1	APCmin	Agaricus	WINAMN94.3M	M	3359491200	WINAMN94.3	WINAMN94	296.51	73.79	25.76	29.63	43.75	168.69	137.55	181.71	76.96	604.44	990.22	389.16	29.1	16	5	21	5.61	6.7961	12.4061
WINAMN94.3M2	APCmin	Agaricus	WINAMN94.3M	M	3359491200	WINAMN94.3	WINAMN94	308.09	50.74	19.27	40.42	46.35	191.95	77.34	158.48	64.01	775.64	720.66	377.44	28	6	0	6	1.95	0	1.95
WINAMN94.3M4	APCmin	Agaricus	WINAMN94.3M	M	3359491200	WINAMN94.3	WINAMN94	141.65	16.65	9.13	15.94	26.96	73.27	49.35	98.59	40	459.61	411.45	154.79	28.6	12	7	19	4.94	10.782	15.722
WINAMN94.3M5	wt	Agaricus	WINAMN94.3M	M	3359491200	WINAMN94.3	WINAMN94	189.4	26.14	10.69	22.46	28.89	88.85	54.14	119.11	42.33	513.18	482.9	189.28	32.3
WINAMN94.3M6	APCmin	Agaricus	WINAMN94.3M	M	3359491200	WINAMN94.3	WINAMN94	223.76	28.59	17.91	30.23	37.63	139.28	82.9	148.13	51.07	469.39	540.39	304.96	29.4	19	3	22	8.69	3.1184	11.8084
WINAMN94.3M7	wt	Agaricus	WINAMN94.3M	M	3359491200	WINAMN94.3	WINAMN94	278.06	57.82	24.97	37.97	43.84	146.9	172.4	168.34	77.48	513.18	814.77	362.44	31.1
WINAMN86.3M3	wt	Water	WINAMN86.3M	M	3359491200	WINAMN86.3	WINAMN86	52.78	20.11	2.23	6.67	7.25	33.47	81.83	39.79	8.96	387.91	281.33	59.01	29.4
WINAMN86.3M4	APCmin	Water	WINAMN86.3M	M	3359491200	WINAMN86.3	WINAMN86	137.41	37.05	10.8	25.91	26.22	51.91	78.86	104.34	42.75	473.14	467.05	196.89	26.5	34	4	38	19.97	6.9178	26.8878
WINAMN86.3F5	wt	Water	WINAMN86.3F	F	3359491200	WINAMN86.3	WINAMN86	25.54	16.81	2.9	5.31	9.96	9.31	13.05	17.72	11.15	251.74	232.52	89.07	24.7
WINAMN88.3F2	wt	Water	WINAMN88.3F	F	3359404800	WINAMN88.3	WINAMN88	109.45	29.8	11.32	25.2	23.16	75.45	94.13	89.24	36.38	331.61	519.03	236.36	27.2
WINAMN88.3M1	wt	Water	WINAMN88.3M	M	3359404800	WINAMN88.3	WINAMN88	127.82	42.14	9.5	19.99	18	57.34	56.45	88.11	27.9	297.47	396.89	150.36	34.6
WINAMN88.3M2	APCmin	Water	WINAMN88.3M	M	3359404800	WINAMN88.3	WINAMN88	65.7	28.59	5.96	9.32	15.33	29.14	40.11	48.28	19.48	215.73	139.91	22.22	27.7	12	1	13	6.39	1.7663	8.1563
WINAMN59.3M3	APCmin	Agaricus	WINAMN59(A)	M	3350592000	WINAMN59.3	WINAMN59	61.04	54.58	5.56	11.91	14.56	73.63	144.28	64.4	39.36	250.85	498.81	273.55	33.6	7	5	12	3.89	2.7475	6.6375
WINAMN82.2F1	wt	Water	WINAMN82.2F	F	3355776000	WINAMN82.2	WINAMN82	82.85	42.29	7.18	15.31	16.76	45.04	86.24	73.99	31.03	392.63	415.63	180.94	28
WINAMN82.2F2	wt	Water	WINAMN82.2F	F	3355776000	WINAMN82.2	WINAMN82	64.54	22.13	5.21	13.62	15.71	49.02	89.51	54.07	29.52	1096.56	354.52	139.37	27
WINAMN82.2M1	APCmin	Water	WINAMN82.2M	M	3355776000	WINAMN82.2	WINAMN82	85.1	30.41	7.23	17.61	16.19	60.24	73.83	66.78	27.79	383.17	418.76	126.34	26.9	26	2	28	39.63	1.1638	40.7938
WINAMN82.2M2	APCmin	Water	WINAMN82.2M	M	3355776000	WINAMN82.2	WINAMN82	41.91	18.07	3.72	18.54	15.33	48.3	56.22	40.49	19.59	610.07	329.94	87.7	31.2
WINAMN51.6M3	APCmin	Water	WINAMN51.6M	M	3351628800	WINAMN51.6	WINAMN51	97.37	13.94	6.37	13.83	24.09	51.19	67.72	146.86	32.1	221.22	419.8	68.18	33.2
WINAMN86.2M4	APCmin	Water	WINAMN86.2M	M	3345494400	WINAMN86.2	WINAMN86	51.58	21.82	4.96	11.91	24.83	49.38	61.59	73.12	23.55	256.14	342.21	107.14	31.3	27	11	38	47.22	34.6597	81.8797
WINAMN86.2M7	APCmin	Water	WINAMN86.2M	M	3345494400	WINAMN86.2	WINAMN86	126.75	24.76	9.96	22.56	30.45	100.45	122.74	105.66	44.97	552.45	520.09	239.49	26.8
WINAMN 61(b)1.3F1	APCmin	Water	WINAMN 61(b	F	3357417600	WINAMN 61(b)1.3	WINAMN 61(b)1	229.75	39.75	15.26	32.53	37.45	116.41	118.96	130.64	57.45	405.16	645.12	384.13	22.5	55	22	77	189.04	47.4513	236.491
WINAMN 61(b)1.3F2	wt	Water	WINAMN 61(b	F	3357417600	WINAMN 61(b)1.3	WINAMN 61(b)1	249.6	30.56	15.26	30.43	36.37	72.19	111.02	128.12	52.64	613.58	696.49	312.27	28.6
WINAMN 61(b)1.3F3	APCmin	Water	WINAMN 61(b	F	3357417600	WINAMN 61(b)1.3	WINAMN 61(b)1	120.3	23.99	9.76	19.68	19.7	95.38	101.49	104.01	50.02	262.27	585.52	344.23	23.1	70	8	78	256	24.2251	280.225
WINAMN93.3M2	APCmin	Agaricus	WINAMN93.3M	M	3360787200	WINAMN93.3	WINAMN93	85.1	21.04	7.79	16.78	13.69	53.72	73.3	76.56	25.62	277.01	317.72	162.95	28.21	11	2	13	5.04	3.2362	8.2762
WINAMN93.3M3	APCmin	Agaricus	WINAMN93.3M	M	3360787200	WINAMN93.3	WINAMN93	164.69	43.92	7.18	16.78	14.75	37.81	36.59	77.4	23.66	337.35	377.2	157.01	27.5	9	3	12	4.33	9.8125	14.1425
WINAMN76.4F1	wt	Agaricus	WINAMN76.4F	F	3360873600	WINAMN76.4	WINAMN76	41.91	14.74	7.08	16.57	12.42	52.64	5.69	67.25	26.05	324.2	393.77	144.49	21.2
WINAMN76.4F3	APCmin	Agaricus	WINAMN76.4F	F	3360873600	WINAMN76.4	WINAMN76	120.3	20.26	6.16	13.62	11.54	34.92	113.14	83.09	42.75	273.56	417.71	253.67	23.7	27	2	29	16.12	0.9813	17.1013
WINAMN76.4F5	wt	Agaricus	WINAMN76.4F	F	3360873600	WINAMN76.4	WINAMN76	120.3	20.73	11.32	25.1	24.28	83.78	168.54	99.28	64.33	356.02	677.86	458.79	22.4
WINAMN76.4F7	APCmin	Agaricus	WINAMN76.4F	F	3360873600	WINAMN76.4	WINAMN76	36.97	12.97	8.51	3.7	17.43	59.15	61.06	32.95	35.53	421.45	94.67	11.3	22.2
WINAMN94.2M4	APCmin	Water	WINAMN94.2M	M	3356294400	WINAMN94.2	WINAMN94	412.11	67.8	25.64	44.22	47.78	185.41	156.06	199.89	80.78	565.38	1007.26	614.98	25.5
WINAMN94.2M3	wt	Water	WINAMN94.2M	M	3356294400	WINAMN94.2	WINAMN94	77.19	56.2	6.37	24.49	16.38	72.19	73.37	48.88	46.13	390.27	460.72	225.43	30.3
WINAMN92.2M2	APCmin	Water	WINAMN92.2M	M	3356294400	WINAMN92.2	WINAMN92	141.65	37.95	8.31	18.13	22.32	80.52	88.82	83.09	35.74	393.42	336.07	196.13	28.8	22	3	25	21.69	16.8775	38.5675
WINAMN97.1M1	APCmin	Water	WINAMN97.1M	M	3356467200	WINAMN97.1	WINAMN97	80.59	7.34	6.11	14.04	16	54.81	53.91	53.51	11.84	408.27	353.49	98.05	26.4
WINAMN97.1F3	APCmin	Water	WINAMN97.1F	F	3356467200	WINAMN97.1	WINAMN97	79	60	75	111	101	108.3	393	98.3	177.3	232	198.5	157.3	24.5
WINAMN82.3F1	wt	Water	WINAMN82.3F	F	3358195200	WINAMN82.3	WINAMN82	40.3	34.8	67.8	71.3	77.8	104.5	296	71	133.5	304.5	169.3	90	27.8
WINAMN82.3F2	wt	Water	WINAMN82.3F	F	3358195200	WINAMN82.3	WINAMN82	30.5	26.5	58	61.5	58.3	84.3	137.5	56.5	94.3	224	139	85.8	29.5
WINAMN82.3F3	APCmin	Water	WINAMN82.3F	F	3358195200	WINAMN82.3	WINAMN82	34.8	35.8	74	71.8	85	85	303.8	84.5	141.5	214.5	183.3	141	23
WINAMN82.3F4	APCmin	Water	WINAMN82.3F	F	3358195200	WINAMN82.3	WINAMN82	41.5	109.8	37.5	42	58.5	60	217	50	73.5	128.5	103.5	88.5	24.5
WINAMN82.3F5	wt	Water	WINAMN82.3F	F	3358195200	WINAMN82.3	WINAMN82	97	39.5	86	105	116.5	116	363.3	118.5	195.8	162.8	229.8	206.8	28.4
WINAMN82.3F7	APCmin	Water	WINAMN82.3F	F	3358195200	WINAMN82.3	WINAMN82	59.3	49.8	81.8	82	140.8	123.3	930.8	92	190.8	186.5	266	246.8	24.2
WINAMN73.3M1	APCmin	Water	WINAMN73.3M	M	3358368000	WINAMN73.3	WINAMN73	26.5	22.5	34.8	44	53	58.5	141	41.5	59.5	160.3	110.3	73.8
WINAMN73.3F1	APCmin	Water	WINAMN73.3F	F	3358368000	WINAMN73.3	WINAMN73	77.5	98.3	75.3	84.5	110.5	94.3	241.5	79.3	129.5	206.5	174.5	143.3	27.2
WINAMN73.3F2	APCmin	Water	WINAMN73.3F	F	3358368000	WINAMN73.3	WINAMN73	24.5	32.8	40	59.5	59.8	45.8	75.5	37.3	57	85.3	123.5	86.3	23.8
WINAMN73.3F3	wt	Water	WINAMN73.3F	F	3358368000	WINAMN73.3	WINAMN73	84.5	42.5	104	99.5	123.5	98.5	551.8	126.5	191.5	154.5	241.3	212.3	27.5
WINAMN72.4F1	APCmin	Water	WINAMN72.4F	F	3358368000	WINAMN72.4	WINAMN72	58	78.5	86.5	68.5	96.5	81.5	483	88.5	176.3	147	150.8	136.5	24.2
WINAMN72.4F2	APCmin	Water	WINAMN72.4F	F	3358368000	WINAMN72.4	WINAMN72	36.8	52.8	64	58	116.3	79	338.3	91.3	135	101.5	183	129.8	24.8
WINAMN83.5M1	wt	Water	WINAMN83.5M	M	3358454400	WINAMN83.5	WINAMN83	33	39.3	59.5	45.5	72.5	66.5	255.3	46.5	137	192.3	74.8	48.5
WINAMN83.5M2	APCmin	Water	WINAMN83.5M	M	3358454400	WINAMN83.5	WINAMN83	27.5	92.8	47.5	65	60	77.5	398.8	54.5	119	119	132.3	129		57	11	68	42.44	22.8749	65.3149
WINAMN95.2M1	wt	Agaricus	WINAMN95.2M	M	3358454400	WINAMN95.2	WINAMN95	87	143.3	101.3	98.5	115.3	90.5	490.8	119.3	187	156.5	227	186.8	32.4
WINAMN95.2M2	APCmin	Agaricus	WINAMN95.2M	M	3358454400	WINAMN95.2	WINAMN95	56	58.8	71.3	71	91	79.5	274.8	83.5	110	131.8	160	129	31.2	12	4	16	9.55	0.8831	10.4331
WINAMN95.2M3	wt	Agaricus	WINAMN95.2M	M	3358454400	WINAMN95.2	WINAMN95	69.5	97.8	119.5	95	131.8	109.8	615.8	121.8	205.5	169	228	212	28.3
WINAMN95.2M4	wt	Agaricus	WINAMN95.2M	M	3358454400	WINAMN95.2	WINAMN95	48	70.8	84	86.8	98.8	125	812	92.5	221.5	198	237.3	216.3	35.4
WINAMN95.2F1	wt	Agaricus	WINAMN95.2F	F	3358454400	WINAMN95.2	WINAMN95	114.3	106.5	156.8	143.5	209.8	146.8	653.5	207.5	268	211.5	309.3	252.5	27.8
WINAMN95.2F2	wt	Agaricus	WINAMN95.2F	F	3358454400	WINAMN95.2	WINAMN95	57.8	56	84.5	59.8	98	47.3	343	109.8	150.5	111.5	179.5	161.5	22.5
WINAMN95.2F3	APCmin	Agaricus	WINAMN95.2F	F	3358454400	WINAMN95.2	WINAMN95	79.5	59.8	86.5	87	87.3	62.5	280	85.5	136.8	146	151.5	166.3		16	5	21	12	5.13	17.13
WINAMN54.6F1	wt	Water	WINAMN54.6F	F	3358627200	WINAMN54.6	WINAMN54	22.3	41	50.8	31.8	86.5	39.5	277.5	40.5	104.3	87.5	61	52.5	27.5
WINAMN54.6F2	wt	Water	WINAMN54.6F	F	3358627200	WINAMN54.6	WINAMN54	33.5	54.5	50.3	46.3	72	61.8	303	71.8	119	105.5	152	153.3	25.3
WINAMN54.6F4	APCmin	Water	WINAMN54.6F	F	3358627200	WINAMN54.6	WINAMN54	33.5	32	36.8	60.5	93	40	132	46.3	86.5	148	118.8	52	26.4	25	2	27	14.44	0.3925	14.8325
WINAMN81.3M1	wt	Water	WINAMN81.3M	M	3358627200	WINAMN81.3	WINAMN81	75.8	74	102	95	137.5	98	314.5	137.5	167	183.8	186.3	156	27
WINAMN72.5M1	APCmin	Water	WINAMN72.5M	M	3360096000	WINAMN72.5	WINAMN72	48.8	52	41.5	57.5	81.3	82.5	292.5	71.3	122	107.5	139	123.5	27.3	25	6	31	14.43	0.9754	15.4054
WINAMN72.5M2	APCmin	Water	WINAMN72.5M	M	3360096000	WINAMN72.5	WINAMN72	58	33.5	78.5	77	108.5	90	455.3	76.5	151.5	138.5	201.8	170.8	30.8	16	1	17	14.43	0.1256	14.5556
WINAMN72.5M4	APCmin	Water	WINAMN72.5M	M	3360096000	WINAMN72.5	WINAMN72	26.5	32.8	55	75.8	109.8	66.5	98.5	62.3	100.8	109	162	96.8	26.4	13	15	28	10.47	9.6437	20.1137
WINAMN72.5F1	wt	Water	WINAMN72.5F	F	3360096000	WINAMN72.5	WINAMN72	96.5	91.3	118.8	114	141.3	125.5	423	141.5	188.5	180.3	238.8	171.8	21.9
WINAMN72.5F2	wt	Water	WINAMN72.5F	F	3360096000	WINAMN72.5	WINAMN72	75.5	67.5	88.8	85.8	91.5	84.3	379.5	100.3	149.8	117.8	183.5	147.3	25.1
WINAMN73.4M1	wt	Water	WINAMN73.4M	M	3360182400	WINAMN73.4	WINAMN73	77	87	92	99.5	124.3	91.5	394.3	129.5	163	145.3	222	150.8	31
WINAMN73.4M3	wt	Water	WINAMN73.4M	M	3360182400	WINAMN73.4	WINAMN73	47.5	53	82.5	74.8	122	81	557.8	113	174.5	139.5	198.8	121	25.5
WINAMN97.2F1	wt	Water	WINAMN97.2F	F	3360096000	WINAMN97.2	WINAMN97	24.5	45.3	32.3	55	76.3	53.5	204.8	38	66.5	75.3	116.3	76	26.9
WINAMN97.2F2	wt	Water	WINAMN97.2F	F	3360096000	WINAMN97.2	WINAMN97	45	50	44	62	94	54	367.8	63.8	113.3	98	158.5	140	26.9
WINAMN97.2M2	APCmin	Water	WINAMN97.2M	M	3360096000	WINAMN97.2	WINAMN97	79.5	101	128	117.5	140	139.5	554	152	211.5	164.5	256.3	235.8	25.6
WINAMN92.3F1	APCmin	Agaricus	WINAMN92.3F	F	3360096000	WINAMN92.3	WINAMN92	37	51.3	63.5	59.5	90	78.8	554.5	76.3	165.5	149	159	168.3	25.9	14	0	14	7.94	0	7.94

## Sheet: In vitro data
	Cytotoxicity: Andosan -induced Apoptosis in Caco-2 cells i					cells in vitro
n= 3
		ktr			0.01			0.05
n		Apoptosis	late apoptosis		Apoptosis	late apoptosis		Apoptosis	late apoptosis
1		7	8		17	22		40	49
2		6	9		13	15		31	34
3		4	5		16	19		36	38
	mean	5.66667	7.33333		15.3333	18.6667		35.6667	40.3333
	SD	1.52753	2.08167		2.08167	3.51188		4.50925	7.76745
			Apoptosis	Late apoptosis
		Ctr	5.7	7.3		1.52753	2.08167
		1.0	15.33	18.7		2.08167	3.5
		5.0	35.7	40.3		4.5	7.6
	Caco2 and andosan
